# Supplementary material for: Metal(ii) complexes synthesized based on quinoline-2,3-dicarboxylate as electrocatalysts for the degradation of methyl orange
Source: Royal Society of Chemistry journal article supplement (doi:10.1039/c3dt53505c), 2014-01-01
Supplement: c3dt53505c1.pdf [file c3dt53505c1.pdf]

## Metal(II) Complexes Based on Quinoline-2,3 -Dicarboxylate as Electrocatalysts for Degradation of Methyl Orange

Yun Gong, <sup>\*a</sup> Miao Miao Zhang, <sup>a</sup> Jian Bo Qin, <sup>a</sup> Jian Li, <sup>a</sup> Jiang Ping Meng <sup>a</sup> and Jian Hua Lin <sup>\* a,b</sup>

<sup>a</sup>Department of Applied Chemistry, College of Chemistry and Chemical Engineering, Chongqing University, Chongqing 400030, P. R. China Tel: +86-023-65106150 E-mail: gongyun7211@cqu.edu.cn

<sup>b</sup>President, Zhejiang University, Hangzhou 310058, P. R. China Tel: +86-0571-88981583 E-mail: jhlin@zju.edu.cn; jhlin@cqu.edu.cn; jhlin@pku.edu.cn

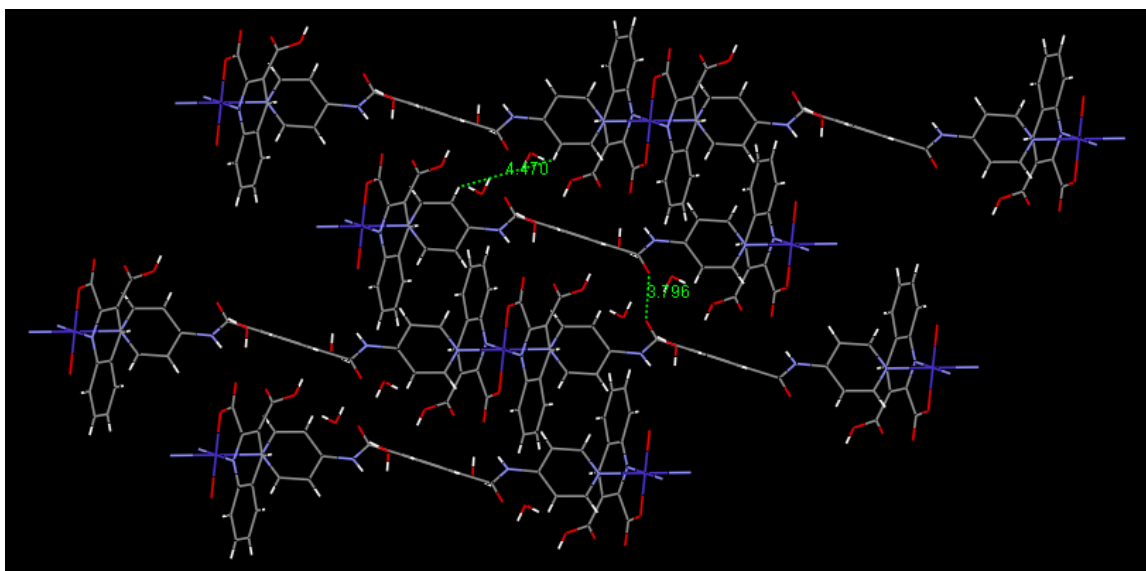

**Fig.S1** 1D channel viewed along *b*-axis in complex **2** with the window size denoted in green numbers, which is occupied by water molecules.

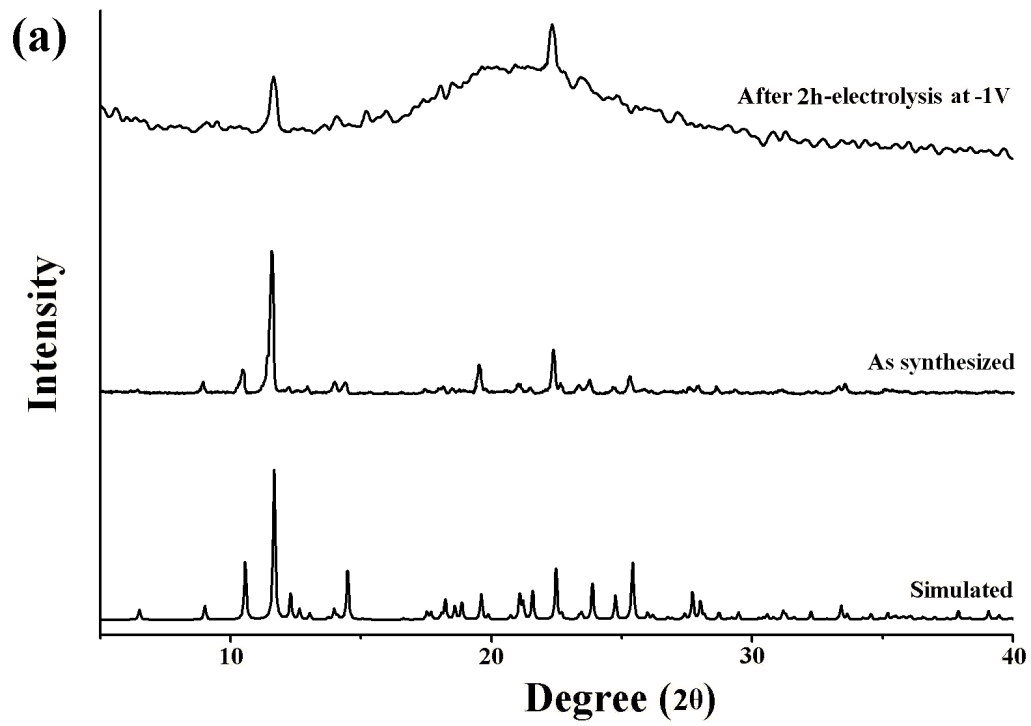

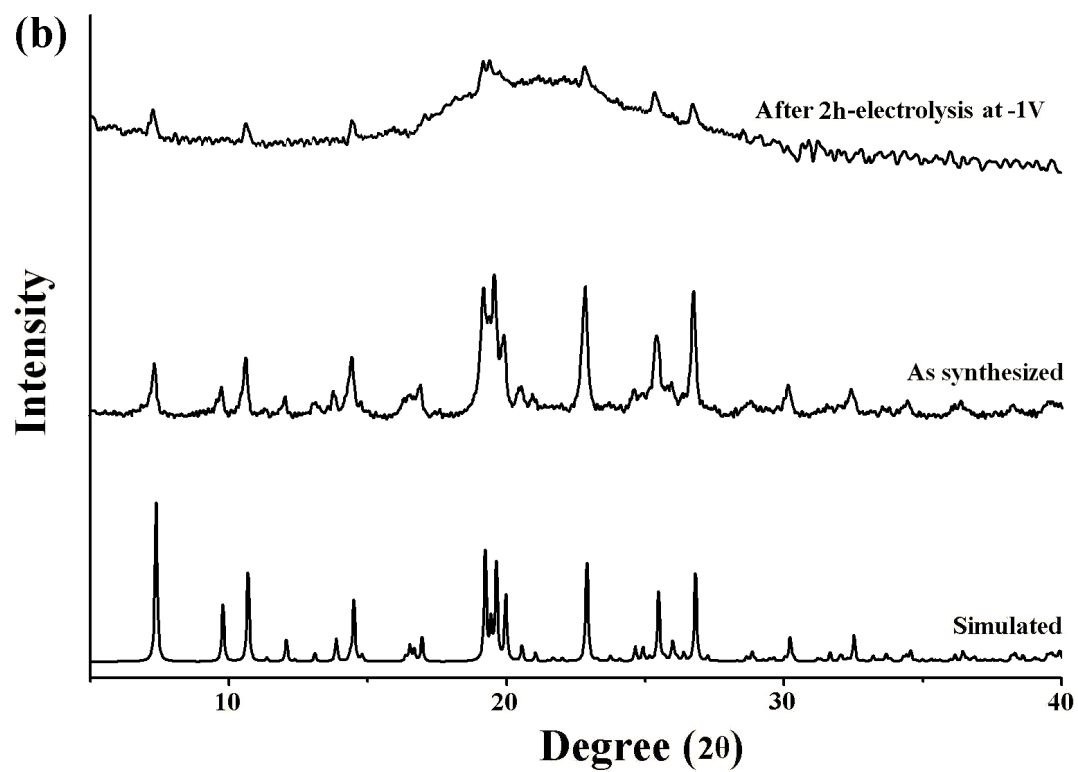

**Fig.S2** The PXRD patterns of complexes **1** (a) and **2** (b).

**(a)**

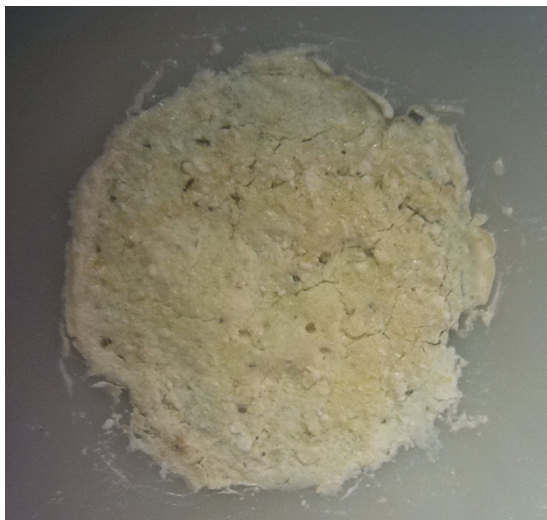

**before electrolysis**

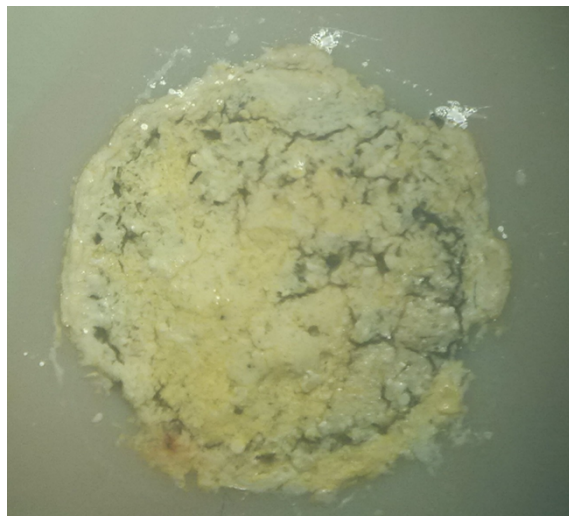

**after 4h- electrolysis at -1V**

**(b)**

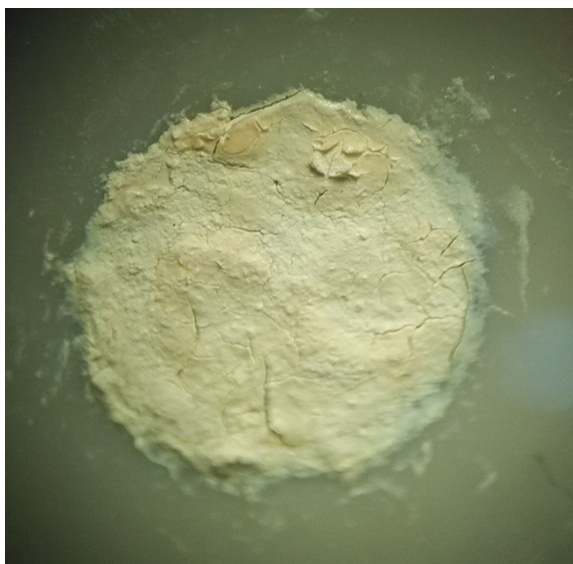

**before electrolysis**

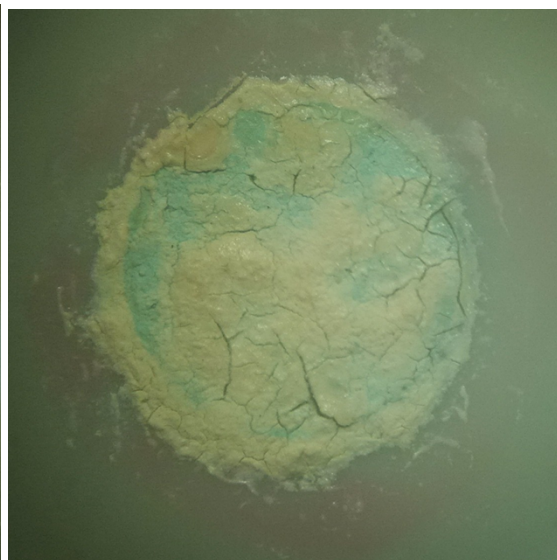

**after 4h- electrolysis at -1V**

**Fig. S3** The images of **1-GCE (a)** and **2-GCE (b)** before and after electrolysis.

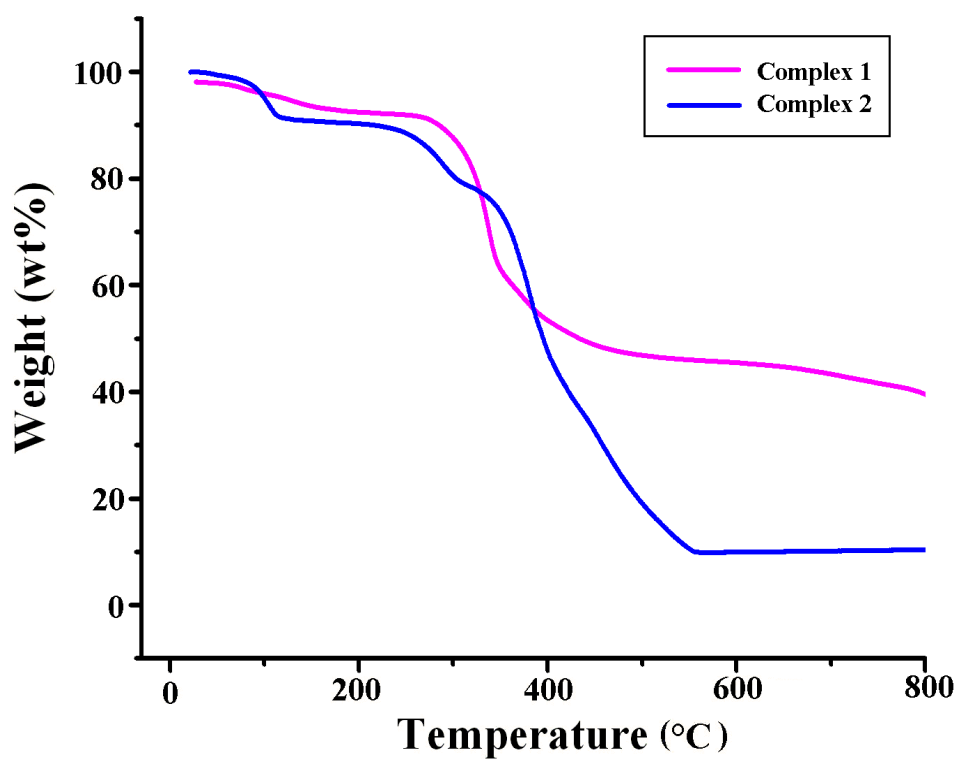

**Fig.S4** TG curves of complexes **1** and **2**.

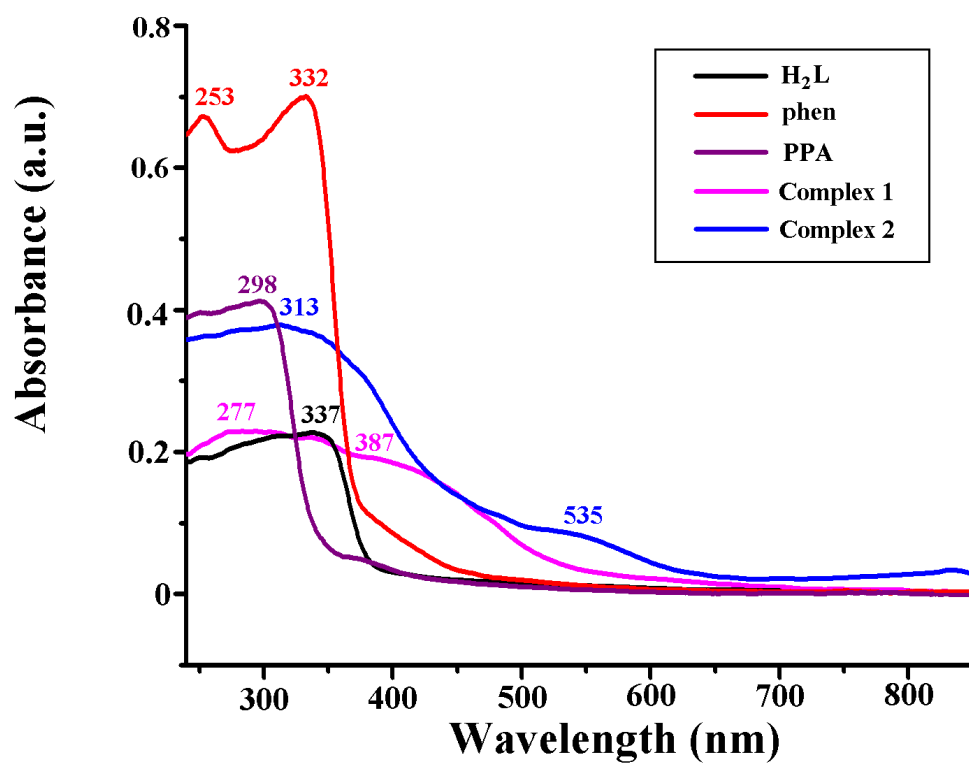

**Fig.S5** UV-vis absorption spectra for the free ligands and complexes **1-2** in the solid state at room temperature.
